# Supplementary material for: NDFIP allows NEDD4/NEDD4L-induced AQP2 ubiquitination and degradation
Source: PubMed Central journal article supplement (PMC5606929; doi:10.1371/journal.pone.0183774), 2017-09-20

Figure S2

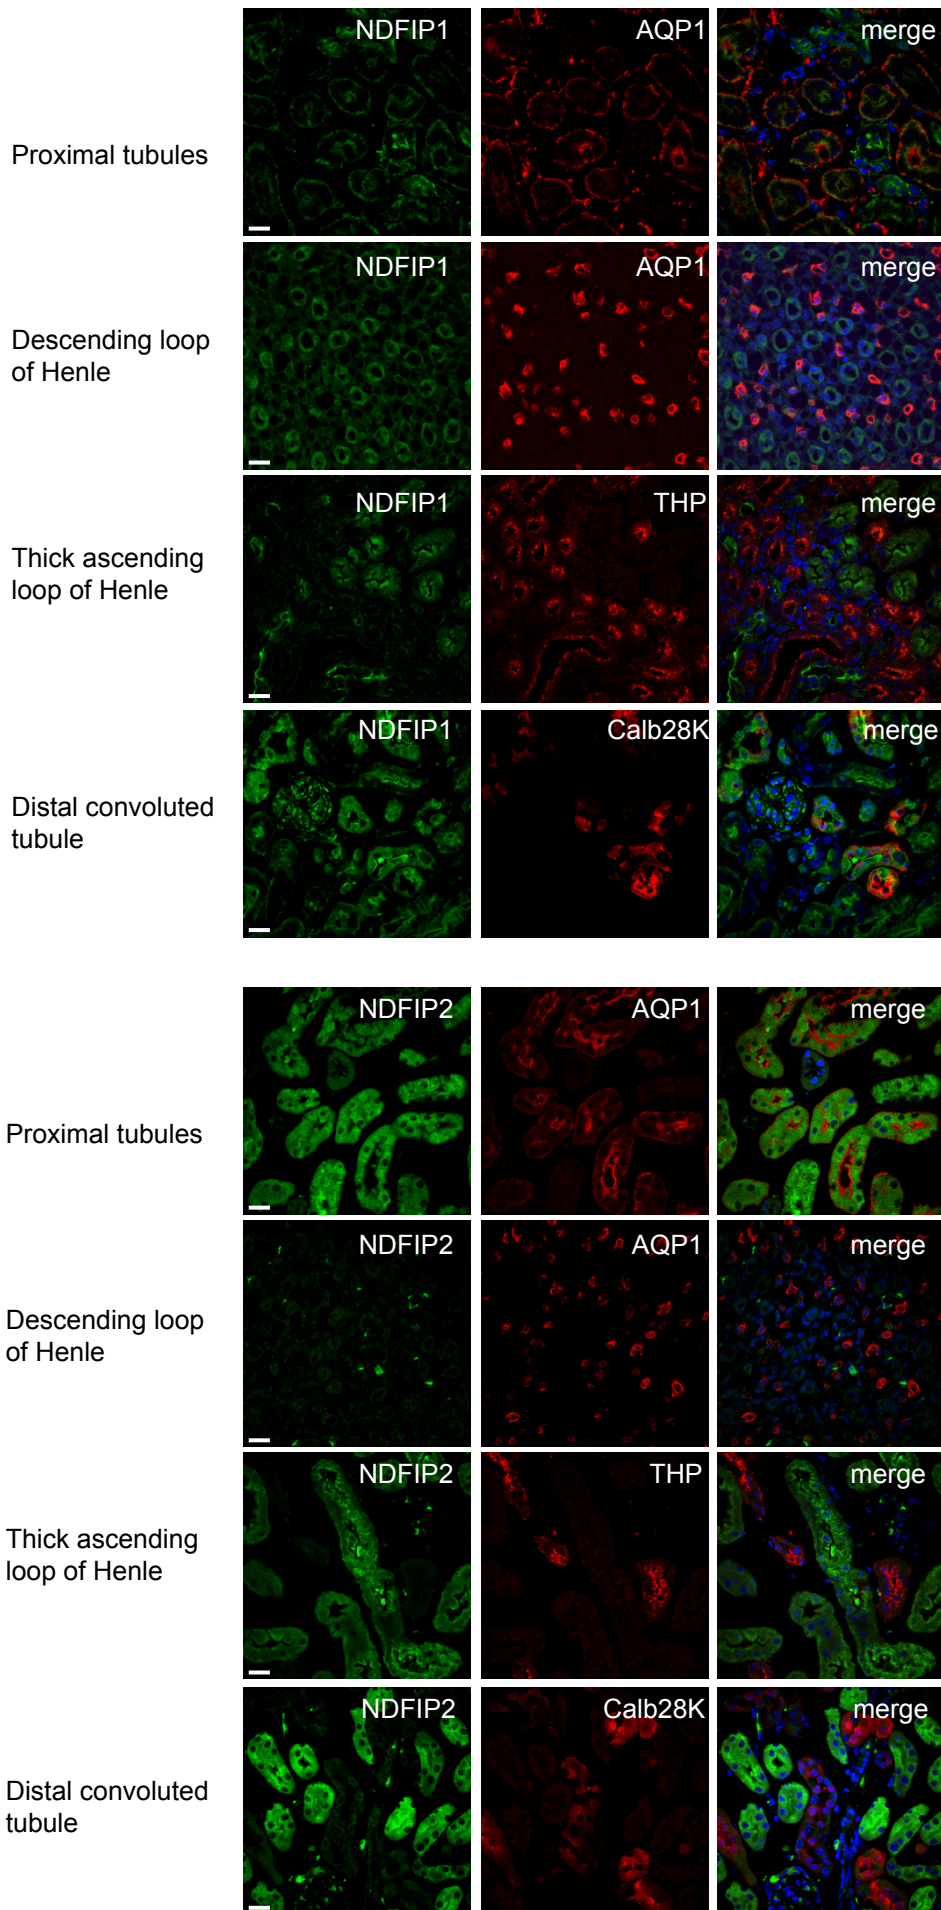

Supplement: pone.0183774.s002.pdf [file pone.0183774.s002.pdf]
