# Supplementary material for: NDFIP allows NEDD4/NEDD4L-induced AQP2 ubiquitination and degradation
Source: PubMed Central journal article supplement (PMC5606929; doi:10.1371/journal.pone.0183774), 2017-09-20
Supplement: pone.0183774.s003.pdf [file pone.0183774.s003.pdf]

**Table S1. Identified proteins in AQP2 MYTH**

| Bait                          | Name                                                                                                                  | Alternative names                                                                       |
|-------------------------------|-----------------------------------------------------------------------------------------------------------------------|-----------------------------------------------------------------------------------------|
| pTMBD-hAQP2wt                 | Homo sapiens syntaxin 8 (STX8), transcript variant 1, mRNA                                                            | CARB                                                                                    |
| pTMBD-hAQP2wt                 | Homo sapiens ubiquitin C (UBC), mRNA                                                                                  | HMG20                                                                                   |
| pTMBD-hAQP2wt                 | Homo sapiens immediate early response 3 (IER3), mRNA                                                                  | DIF2; IEX1; PRG1; DIF-2; GLY96; IEX-1; IEX-1L                                           |
| pTMBD-hAQP2wt                 | Homo sapiens aquaporin 2 (collecting duct) (AQP2), mRNA                                                               |                                                                                         |
| pTMBD-hAQP2wt                 | Homo sapiens Nedd4 family interacting protein 2 (NDFIP2), transcript variant 1, mRNA                                  | N4WBP5A; FLJ25842; KIAA1165                                                             |
| pTMBD-hAQP2wt                 | Homo sapiens B-cell receptor-associated protein 31 (BCAP31), transcript variant 4, non-coding RNA                     | CDM; BAP31; 6C6-AG; DXS1357E                                                            |
| pTMBD-hAQP2wt                 | Homo sapiens chromosome 20 open reading frame 30 (C20orf30), transcript variant 4, mRNA                               |                                                                                         |
| pTMBD-hAQP2wt                 | Homo sapiens signal peptidase complex subunit 1 homolog ( <i>S. cerevisiae</i> ) (SPCS1), mRNA                        | SPC1; SPC12; HSPC033; YJR010C-A                                                         |
| pTMBD-hAQP2-K270R             | Homo sapiens proteolipid protein 2 (colonic epithelium-enriched) (PLP2), mRNA                                         | A4; A4LSB; MGC126187                                                                    |
| pTMBD-hAQP2-K270R             | Homo sapiens ubiquitin-conjugating enzyme E2, J1, U (UBE2J1), mRNA                                                    | UBC6; Ubc6p; CGI-76; NCUBE1; HSPC153; HSPC205; NCUBE-1; HSU93243; MGC12555              |
| pTMBD-hAQP2-K270R             | Homo sapiens coiled-coil domain containing 167 (CCDC167), mRNA                                                        |                                                                                         |
| pTMBD-hAQP2-K270R             | Homo sapiens chromosome 14 open reading frame 1 (C14orf1), mRNA                                                       |                                                                                         |
| pTMBD-hAQP2-K270R             | Homo sapiens signal sequence receptor, gamma (translocon-associated protein gamma) (SSR3), mRNA                       | TRAPG                                                                                   |
| pTMBD-hAQP2-K270R             | Homo sapiens collagen, type IV, alpha 3 (Goodpasture antigen) binding protein (COL4A3BP), transcript variant 1, mRNA  | CERT; GPBP; CERTL; STARD11; FLJ20597                                                    |
| pTMBD-hAQP2-S261D             | Homo sapiens claudin 7 (CLDN7), mRNA                                                                                  | CLDN-7; CEPTRL2; CPETRL2; Hs.84359; claudin-1                                           |
| pTMBD-hAQP2-S261D             | Homo sapiens actin, beta (ACTB), mRNA                                                                                 | PS1TP5BP1                                                                               |
| pTMBD-hAQP2-S261D             | Homo sapiens chromosome 4 open reading frame 3 (C4orf3), transcript variant 2, mRNA                                   |                                                                                         |
| pTMBD-hAQP2-S261D             | Homo sapiens signal peptidase complex subunit 1 homolog ( <i>S. cerevisiae</i> ) (SPCS1), mRNA                        | SPC1; SPC12; HSPC033; YJR010C-A                                                         |
| pTMBD-hAQP2-S256D-S264D-T269E | Homo sapiens eukaryotic translation elongation factor 1 alpha 1 (EEF1A1), mRNA                                        | CCS3; EF1A; PTI1; CCS-3; EE1A1; EEF-1; EEF1A; EF-Tu; LENG7; eEF1A-1; FLJ25721; GRAF-1EF |
| pTMBD-hAQP2-S256D-S264D-T269E | Homo sapiens solute carrier family 5 (sodium/glucose cotransporter), member 2 (SLC5A2), mRNA                          | SGLT2                                                                                   |
| pTMBD-hAQP2-S256D-S264D-T269E | Homo sapiens sorting nexin 5 (SNX5), transcript variant 1, mRNA                                                       | FLJ10931                                                                                |
| pBT3-hAQP2-S256D-S264D-T269E  | Homo sapiens elongation factor, RNA polymerase II, 2 (ELL2), mRNA                                                     |                                                                                         |
| pBT3-hAQP2-S256D-S264D-T269E  | Homo sapiens VAMP (vesicle-associated membrane protein)-associated protein B and C (VAPB), transcript variant 1, mRNA | ALS8; VAP-B; VAMP-B                                                                     |
| pBT3-hAQP2-S256D-S264D-T269E  | FAM48A (family with sequence similarity 48, member A)                                                                 | C13; FP757; P38IP; SPT20; C13orf19; bA421P11.4                                          |
| pBT3-hAQP2-S256D-S264D-T269E  | TM9SF2 (transmembrane 9 superfamily member 2)                                                                         | P76                                                                                     |
| pBT3-hAQP2-S256D-S264D-T269E  | GPAA1 glycosylphosphatidylinositol anchor attachment protein 1 homolog                                                | GAA1; hGAA1                                                                             |
