# Supplementary material for: NDFIP allows NEDD4/NEDD4L-induced AQP2 ubiquitination and degradation
Source: PubMed Central journal article supplement (PMC5606929; doi:10.1371/journal.pone.0183774), 2017-09-20
Supplement: pone.0183774.s004.pdf [file pone.0183774.s004.pdf]

**Table S2. Sequences of siRNA SMARTpools (Thermo Fisher Scientific, Lafayette, CO, USA)**

| <b>Gene Symbol</b> | <b>Gene Accession</b> | <b>siRNA sequences (pool of 4)</b>                                                       |
|--------------------|-----------------------|------------------------------------------------------------------------------------------|
| Nedd4              | NM_010890             | GGAAGGACCUACUACGUAA<br>GGGCGAGUCUUCUUCAUAA<br>AGACUGACAUUCCAAACAA<br>UAAUUACACCCUACAGAU  |
| Nedd4L             | NM_001114386          | CGACCCAGCUUGAUGGAUG<br>AGUCAUAAAUCUCGAGUCA<br>CUUCGGUCCUGCAGUGUUA<br>CGGAGGAUCAUGUCUGUAA |
| Ndfip1             | NM_022996             | GAACCAAGACUGAAGCUAC<br>GGAUUUAUCAAUUACGCAA<br>GUUCGGAAGAUGCCAGAAA<br>GCUGAGGAUAGGAAACGAU |
| Ndfip2             | NM_029561             | CGGGAUGACUUCAGUGAUG<br>UACCAUCGCUGGAAGAUAC<br>CUAUUCAAUGGACAGUAU<br>GGUACUUCUUCUGCUAUA   |
