# Supplementary material for: NDFIP allows NEDD4/NEDD4L-induced AQP2 ubiquitination and degradation
Source: PubMed Central journal article supplement (PMC5606929; doi:10.1371/journal.pone.0183774), 2017-09-20
Supplement: pone.0183774.s005.pdf [file pone.0183774.s005.pdf]

**Table S3. Primer sequences**

| <b>Protein</b> | <b>forward primer 5'...3'</b> | <b>reverse primer 5'...3'</b> |
|----------------|-------------------------------|-------------------------------|
| NDFIP1         | GCGGGTACCAGCAGTTGCAGAAT       | GCAGTGATGCTGCTGTATGGTGGGA     |
| NDFIP2         | GGTGCTATCTGTGGGTTTGGCCTTT     | GAAAAGGAGCAGGCCAAGTACGAGA     |
| GAPDH          | TAACATCAAATGGGGTGAGG          | GGTTCACACCCATCACAAAC          |
